# Supplementary material for: Natural Products for the Prevention and Treatment of Common Cold and Viral Respiratory Infections
Source: MDPI journal article supplement (doi:10.3390/ph16050662), 2023-04-28
Supplement: s1 [file s1]

# Natural Products for the Prevention and Treatment of Common Cold and Viral Respiratory Infections

Nour Mammari <sup>1</sup>, Quentin Albert <sup>2,3</sup>, Marc Devocelle <sup>4,5</sup>, Maša Kenda <sup>6</sup>, Nina Kočevr Glavač <sup>6</sup>, Marija Sollner Dolenc <sup>6</sup>, Laura Mercolini <sup>7</sup>, Jaroslav Tóth <sup>8</sup>, Nagy Milan <sup>8</sup>, Szilvia Czige <sup>8</sup>, Mihayl Varbanov <sup>1,9,\*</sup> and on behalf of the OEMONOM <sup>†</sup>

<sup>1</sup> CNRS, L2CM, Université de Lorraine, 54000 Nancy, France

<sup>2</sup> INRAE, Aix Marseille Université, UMR1163 Biodiversité et Biotechnologies Fongiques, 13288 Marseille, France

<sup>3</sup> INRAE, Aix Marseille Université, CIRM-CF, 13288 Marseille, France

<sup>4</sup> SSPC (Synthesis & Solid State Pharmaceutical Centre), V94 T9PX Limerick, Ireland

<sup>5</sup> Department of Chemistry, Royal College of Surgeons in Ireland, RCSI University of Medicine and Health Sciences, 123 St. Stephen's Green, D02 YN77 Dublin, Ireland

<sup>6</sup> Faculty of Pharmacy, University of Ljubljana, Aškerčeva cesta 7, 1000 Ljubljana, Slovenia

<sup>7</sup> Research Group of Pharmaco-Toxicological Analysis (PTA Lab), Department of Pharmacy and Biotechnology (FaBiT), Alma Mater Studiorum—University of Bologna, Via Belmeloro 6, 40126 Bologna, Italy

<sup>8</sup> Department of Pharmacognosy and Botany, Faculty of Pharmacy, Comenius University Bratislava, Odbojárov 10, 832 32 Bratislava, Slovakia

<sup>9</sup> Laboratoire de Virologie, CHRU de Nancy Brabois, 54500 Vandœuvre-lès-Nancy, France

\* Correspondence: mihayl.varbanov@univ-lorraine.fr; Tel.: +33-3-72-74-73-19

† Listed at the end of Acknowledgments.

## 1. Other medicinal plants with EMA monography with potential effects on common cold

### 1.1 *Foeniculum vulgare* Miller subsp. *vulgare* var. *vulgare*

According to the EMA, the herb *Foeniculum vulgare* Miller subsp. *vulgare* var. *vulgare* is used as an expectorant in coughs associated with colds. The expectorant effect of this plant is essentially due to its composition. Indeed, the two main components anethole and estragole are recognized by their traditional use of cough associated with colds [131].

### 1.2 *Matricaria recutita* L.

Is known to treat cough and bronchitis, fever, colds, inflammation and infection [132]. As in the case of the plant *Glycyrrhiza*, it has been used in the mixed herb ASMATUSTM to relieve the symptoms of colds in asthmatic children [76].

### 1.3 *Polygonium aviculare* L. / *Polypodium vulgare* L.

The Committee on Herbal Medicinal Products and EMA reported that *Polygonium aviculare* L. can be used for the relief of symptoms of a

common cold, and for treating symptoms of minor mouth or throat inflammation [133].

#### 1.4 *Salix purpurea* L. / *Salix daphnoides* Vill. / *Salix fragilis* L.

The Committee on Herbal Medicinal Products and EMA reported that the traditional herbal *Salix purpurea* L. / *Salix daphnoides* Vill. / *Salix fragilis* L. product used for the relief of fever associated with the common cold [134].

**Table S1.** Herbal combinations used in the treatment of the common cold.

| Plant                                                      | Family         | Infection                                                                       | References |
|------------------------------------------------------------|----------------|---------------------------------------------------------------------------------|------------|
| <i>Allium sativum</i> L.                                   | Amaryllidaceae | Common cold;<br>COVID19;<br>Rhinoviruses.                                       | [48-50]    |
|                                                            |                |                                                                                 |            |
| <i>Echinacea purpurea</i><br><i>Echinacea angustifolia</i> | Asteraceae     | Common cold;<br>Coronavirus<br>229E and SARS-<br>CoV-2;<br>Rhinovirus<br>colds. | [51-61]    |
| <i>Eucalyptus globulus</i> Labill.                         | Myrtaceae      | Acute<br>respiratory<br>infection.                                              | [62-69]    |
| <i>Grindelia robusta</i> Nutt                              | Asteraceae     | Acute<br>respiratory<br>infection.                                              | [15]       |
| <i>Grindelia squarrosa</i> (Pursh)                         |                |                                                                                 | [70-72]    |
| Dunal                                                      |                |                                                                                 |            |
| <i>Grindelia humilis</i> Hook. et<br>Arn.                  |                |                                                                                 |            |
| <i>Grindelia camporum</i><br>Greene                        |                |                                                                                 |            |

*Glycyrrhiza glabra* L.

*Glycyrrhiza inflata*

Bat.

Fabaceae

upper  
respiratory  
infections;  
common colds.

[73-76]

*Glycyrrhiza uralensis*

Fisch

*Mentha × piperita* L.

Lamiaceae

common colds;  
respiratory  
syncytial virus  
(RSV).

[77-82]

*Origanum dictamnus* L.

Lamiaceae

Upper  
respiratory  
infections.

[82-84]

*Pelargonium sidoides* DC

Geraniaceae

Common cold;  
Acute  
respiratory  
tract infections.

[85-90]

*Pelargonium reniforme*

Curt.

*Pimpinella anisum* L.

Apiaceae

Expectorant;  
Common cold.

[91,92]

*Primula elatior*

Primulaceae

Antitussive

[93-96]

(L.) Hill

*Primula veris* L.

|                                                                                                |                  |                                             |                       |
|------------------------------------------------------------------------------------------------|------------------|---------------------------------------------|-----------------------|
| <i>Sambucus nigra</i>                                                                          | Adoxaceae        | Common cold and influenza (A and B).        | [97-102]              |
| <i>Sideritis scardica</i> Griseb.                                                              | Lamiaceae        | Bronchitis; bronchial asthma; common colds. | [103-105]             |
| <i>Sideritis clandestina</i> (Bory & Chaub.) Hayek./ <i>Sideritis raeseri</i> Boiss./ & Heldr. |                  |                                             |                       |
| <i>Sideritis syriaca</i> L.                                                                    |                  |                                             |                       |
| <i>Thymus vulgaris</i> L.,<br><i>Thymus zygis</i> L.                                           |                  |                                             |                       |
|                                                                                                | Lamiaceae        | Antitussive; common cold; Human rhinovirus. | [17][22]<br>[106-124] |
| <i>Tilia cordata</i> Miller                                                                    | Tiliaceae        | Common cold.                                | [125]                 |
| <i>Tilia platyphyllos</i> Scop.                                                                |                  |                                             |                       |
| <i>Tilia</i> × <i>vulgaris</i> Heyne                                                           |                  |                                             |                       |
| <i>Verbascum thapsus</i> L.                                                                    | Scrophulariaceae | Common colds; coughs; Asthma; Bronchitis    | [126-130]             |
| <i>Verbascum densiflorum</i> Bertol.                                                           |                  |                                             |                       |

*Verbascum phlomoides* L.

|                                                                               |          |              |       |
|-------------------------------------------------------------------------------|----------|--------------|-------|
| <i>Foeniculum vulgare</i> Miller<br>subsp. <i>vulgare</i> var. <i>vulgare</i> | Apiaceae | Expectorant. | [131] |
|-------------------------------------------------------------------------------|----------|--------------|-------|

|                               |            |                                                 |           |
|-------------------------------|------------|-------------------------------------------------|-----------|
| <i>Matricaria recutita</i> L. | Asteraceae | Antitussive;<br>Bronchitis;<br>Fever;<br>Colds. | [76][132] |
|-------------------------------|------------|-------------------------------------------------|-----------|

|                                                                |              |               |       |
|----------------------------------------------------------------|--------------|---------------|-------|
| <i>Polygonium aviculare</i> L.<br><i>Polypodium vulgare</i> L. | Polygonaceae | Common colds. | [133] |
|----------------------------------------------------------------|--------------|---------------|-------|

|                                                                                       |            |               |       |
|---------------------------------------------------------------------------------------|------------|---------------|-------|
| <i>Salix purpurea</i> L.<br><i>Salix daphnoides</i> Vill.<br><i>Salix fragilis</i> L. | Salicaceae | Common colds. | [134] |
|---------------------------------------------------------------------------------------|------------|---------------|-------|

|                         |               |  |           |
|-------------------------|---------------|--|-----------|
| <i>Aloe arborescens</i> | Asphodelaceae |  | [135-137] |
|-------------------------|---------------|--|-----------|

|                                                                                          |            |                                                                                                                                                                                                                                        |           |
|------------------------------------------------------------------------------------------|------------|----------------------------------------------------------------------------------------------------------------------------------------------------------------------------------------------------------------------------------------|-----------|
|                                                                                          |            | Upper<br>respiratory tract<br>infections;<br>Human<br>rhinovirus B<br>(HRV14),<br>influenza A virus<br>(H1N1) and<br>(H3N2),<br>influenza B,<br>respiratory<br>syncytial virus<br>(RSV),<br>parainfluenza<br>type 3 virus<br>(Para 3). |           |
| <i>Boehmeria jamaicensis</i>                                                             | Urticaceae | Common colds.                                                                                                                                                                                                                          | [138]     |
| <i>Camellia sinensis</i> (L.)<br>Kuntze<br><i>Camellia assamica</i> var.<br><i>kucha</i> | Theaceae   | Anti-Influenza<br>viral adsorption<br>and suppressed<br>replication;<br>Cold viruses;<br>Common cold.                                                                                                                                  | [139-140] |
| <i>Cistus × incanus</i> L.                                                               | Cistaceae  | Common colds;<br>upper<br>respiratory tract;<br>Anti-Influenza.                                                                                                                                                                        | [141-146] |
| <i>Cinnamomum cassia</i>                                                                 | Lauraceae  | Common cold;<br>Chronic<br>bronchitis;                                                                                                                                                                                                 | [147]     |

|                                                            |                                          |                                          |                           |
|------------------------------------------------------------|------------------------------------------|------------------------------------------|---------------------------|
|                                                            |                                          | Human<br>respiratory<br>syncytial virus. |                           |
| <i>Larix decidua</i> Mill.                                 | Pinaceae                                 | Common cold.                             | [148-150]                 |
| <i>Paeonia lactiflora</i>                                  | Fabaceae                                 | Rhinoviruses.                            | [151,152]                 |
| <b>Herbal combination<br/>Plants</b>                       | <b>Family</b>                            | <b>Infection.</b>                        | <b>References</b>         |
| <i>Hedera helix/ Primula<br/>vulgaris/Thymus vulgaris</i>  | Araliaceae/<br>Primulaceae/<br>Lamiaceae | Common cold.<br>Acute bronchitis.        | [21-<br>23][117,118][153] |
| <b>Tsumura bakumondoto:</b>                                |                                          | Common cold.                             | [154]                     |
| <b>Ophiopogon tuber</b><br>( <i>Ophiopogon japonicus</i> ) | Asparagaceae                             |                                          |                           |
| <b>Brown rice</b><br>( <i>Oryza sativa</i> )               | Poaceae                                  |                                          |                           |
| <b>Pinellia tuber</b><br>( <i>Pinellia ternata</i> )       | Araceae                                  |                                          |                           |
| <b>Jujube</b><br>( <i>Ziziphus jujuba</i> )                | Rhamnaceae<br>Fabaceae                   |                                          |                           |
| Liquiritiae radix<br>( <i>Glycyrrhiza lepidota</i> )       |                                          |                                          |                           |
| <b>Ginseng</b> radix                                       | Araliaceae                               |                                          |                           |

(*Panax ginseng*)

|                                                              |           |              |             |
|--------------------------------------------------------------|-----------|--------------|-------------|
| <b>Gelo Myrtol®</b>                                          | Myrtaceae | Common cold. | [155] [156] |
| <b>eucalyptus</b><br>( <i>Eucalyptus grandis</i> )           | Rutaceae  |              |             |
| <b>sweet orange</b><br>( <i>Citrus sinensis</i> (L.) Osbeck) | Myrtaceae |              |             |
| <b>myrtle</b><br>( <i>Myrtus communis</i> )                  | Rutaceae  |              |             |
| <b>lemon</b><br>( <i>Citrus limon</i> )                      |           |              |             |

|                                                                                                     |               |                                                             |            |
|-----------------------------------------------------------------------------------------------------|---------------|-------------------------------------------------------------|------------|
| Soshiho-tang:<br>( <b>Oriental herbal formulain</b><br><b>East Asian countries</b> )                |               | Common cold;<br>(chills and fever)<br>Pulmonary<br>disease. | [157][158] |
| <b>Bupleuri Radix</b><br>( <i>Bupleurum</i><br><i>falcatum</i> Linne)                               | Umbelliferae  |                                                             |            |
| <b>Pinelliae Tuber</b><br>( <i>Pinellia</i><br><i>ternate</i> Breitenbach)                          | Araceae       |                                                             |            |
| <b>Zingiberis Rhizoma</b><br><b>Crudus</b><br>( <i>Zingiber officinale</i> Roscoe)                  | Zingiberaceae |                                                             |            |
| <b>Scutellariae Radix</b><br>( <i>Scutellaria</i><br><i>baicalensis</i> Georgi)                     | Labiatae      |                                                             |            |
| <b>Ginseng Radix (Panax</b><br><b>ginseng C.A.Meyer)</b>                                            | Araliaceae    |                                                             |            |
| <b>Glycyrrhizae Radix et</b><br><b>Rhizoma</b><br>( <i>Glycyrrhiza</i><br><i>uralensis</i> Fischer) | Leguminosae   |                                                             |            |
| <b>Zizyphi Fructus</b>                                                                              | Rhamnaceae    |                                                             |            |



(*Zizyphus jujube* Miller  
var. *inermis* Rehder)

|                                                                                                                                                                                             |             |                                 |       |
|---------------------------------------------------------------------------------------------------------------------------------------------------------------------------------------------|-------------|---------------------------------|-------|
| <b>Kan Jang</b> ®<br><i>Justicia adhatoda</i> L. leaf,<br><i>Echinacea purpurea</i> (L.)<br>Moench root,<br>and <i>Eleutherococcus</i><br><i>senticosus</i> (Rupr. &<br>Maxim.) Harms root. | Acanthaceae | Respiratory tract<br>infection. | [159] |
|---------------------------------------------------------------------------------------------------------------------------------------------------------------------------------------------|-------------|---------------------------------|-------|

|                                                                        |                  |              |       |
|------------------------------------------------------------------------|------------------|--------------|-------|
| <b>So-cheong-ryong-tang:</b>                                           | Araceae          | Common cold. | [160] |
| <b>Pinelliae</b> tuber (tuber<br>of <i>Pinellia ternata</i> ),         | Ephedraceae      |              |       |
| <b>Ephedrae</b> herba (stem<br>of <i>Ephedra sinica</i> ),             | Schisandraceae   |              |       |
| <b>Schizandrae</b> fructus (fruit<br>of <i>Schisandra chinensis</i> ), | Ranunculaceae    |              |       |
| <b>Paeoniae</b> radix (root<br>of <i>Paeonia lactiflora</i> ),         | Fabaceae         |              |       |
| <b>Glycyrrhizae</b> radix (root<br>of <i>Glycyrrhiza uralensis</i> ),  | Zingiberaceae    |              |       |
| <b>Zingiberis</b> Siccatum<br>rhizoma (scalded rhizome)                | Aristolochiaceae |              |       |

|                                                                                                                                                                                                                                                                                                                                                                                                                                                                                                                                                                                                                                                                                                                                                                                                                                                                                                                                                                                                                                                                                           |                                                                                                                                                                                   |  |
|-------------------------------------------------------------------------------------------------------------------------------------------------------------------------------------------------------------------------------------------------------------------------------------------------------------------------------------------------------------------------------------------------------------------------------------------------------------------------------------------------------------------------------------------------------------------------------------------------------------------------------------------------------------------------------------------------------------------------------------------------------------------------------------------------------------------------------------------------------------------------------------------------------------------------------------------------------------------------------------------------------------------------------------------------------------------------------------------|-----------------------------------------------------------------------------------------------------------------------------------------------------------------------------------|--|
| of <i>Zingiber officinale</i> ),<br>Asiasari radix (root<br>of <i>Asiasarum</i><br><i>heterotropoides</i> var.<br><i>mandshuricum</i> ), and<br>Cinnamomi cortex (bark<br>of <i>Cinnamomum cassia</i> )                                                                                                                                                                                                                                                                                                                                                                                                                                                                                                                                                                                                                                                                                                                                                                                                                                                                                   | Lauraceae                                                                                                                                                                         |  |
| Yeon-gyo-pae-dok-san:<br>Forsythiae fructus (fruit<br>of <i>Forsythia viridissima</i> ),<br>Lonicerae flos (flower<br>of <i>Lonicera japonica</i> ),<br>Schizonepetae spica<br>(peduncle of <i>Schizonepeta</i><br><i>tenuifolia</i> ), Ledebouriellae<br>radix (root of <i>Ledebouriella</i><br><i>divaricata</i> ), Bupleuri radix<br>(root of <i>Bupleurum</i><br><i>falcatum</i> ), Angenlicae<br>Decursivae radix (root<br>of <i>Angelica decursiva</i> ),<br>Osterici radix (root<br>of <i>Ostericum koreanum</i> ),<br>Araliae Continentalis radix<br>(root of <i>Aralia</i><br><i>continentalis</i> ), Aurantii<br>fructus (fruit of <i>Citrus</i><br><i>aurantum</i> ), Platycodonis<br>radix (root of <i>Planticodon</i><br><i>grandiflorum</i> ), Cnidii<br>rhizoma (rhizome<br>of <i>Cnidium officinale</i> ),<br>Poria sclerotium (sclerotia<br>of <i>Poria</i> ), Menthae herba<br>(stem of <i>Mentha arvensis</i> ),<br>Glycyrrhizae radix (root<br>of <i>Glycyrrhiza uralensis</i> ),<br>and Zingiberis rhizoma<br>crudus (raw rhizome of<br><i>Zingiber officinale</i> ) | Oleaceae<br>Caprifoliaceae<br>Labiatae<br>Umbelliferae<br>Mentheae<br>Apiaceae<br>Araliaceae<br>Rutaceae<br>Apiaceae<br>Polyporaceae<br>Lamiaceae<br>Leguminosae<br>Zingiberaceae |  |

|                           |            |                   |           |
|---------------------------|------------|-------------------|-----------|
| <i>Radix echinaceae</i> , | Asteraceae | Acute viral       | [24][161] |
| <i>Radix baptisiae</i> ,  | Fabaceae   | respiratory tract |           |
| <i>Herba thujae</i> .     | cypress    | infection.        |           |

|                                        |             |                 |       |
|----------------------------------------|-------------|-----------------|-------|
| <b>Ma-xing-shi-gan-tang:</b>           | Ephedraceae | Common cold;    | [162] |
| <i>Ephedrae herba</i> (ma              | Rosaceae    | Fever;          |       |
| <b>huang), <i>Armeniacae</i></b>       | Fabaceae    | Influenza virus |       |
| <i>amarum semen</i> (ku-xing-          |             | infections.     |       |
| <b>ren), <i>Glycyrrhizae radix</i></b> |             |                 |       |
| <i>preparata</i> (gan-cao;             |             |                 |       |
| <b>licorice), and <i>Gypsum</i></b>    |             |                 |       |
| <i>fibrosum</i> (shi-gao; calcium      |             |                 |       |
| <b>sulfate)</b>                        |             |                 |       |

---
